# Supplementary material for: Polyhedral oligomeric silsesquioxane (POSS)-silicon/carbon quantum dots nanocomposites for cell imaging
Source: Royal Society of Chemistry journal article supplement (doi:10.1039/d4ra02987a), 2024-01-01
Supplement: d4ra02987a1.pdf [file d4ra02987a1.pdf]

## Supporting Information

### Polyhedral oligomeric silsesquioxane (POSS)-carbon/silicon quantum dots nanocomposites for cell imaging

Hai Liang<sup>#1</sup>, Fan Wu<sup>#2</sup>, Runan Xia<sup>1</sup>, Wei Wu<sup>1</sup>, Siqi Li<sup>2</sup>, Panpan Di<sup>1</sup>, Miao Yang<sup>\*1</sup>

1. Department of Pharmacy, The People's Hospital of Bozhou, Bozhou, Anhui Province, P. R. China

2. School of Physics and Optoelectronic Engineering, Anhui University, Hefei, 230601, Anhui, P. R. China

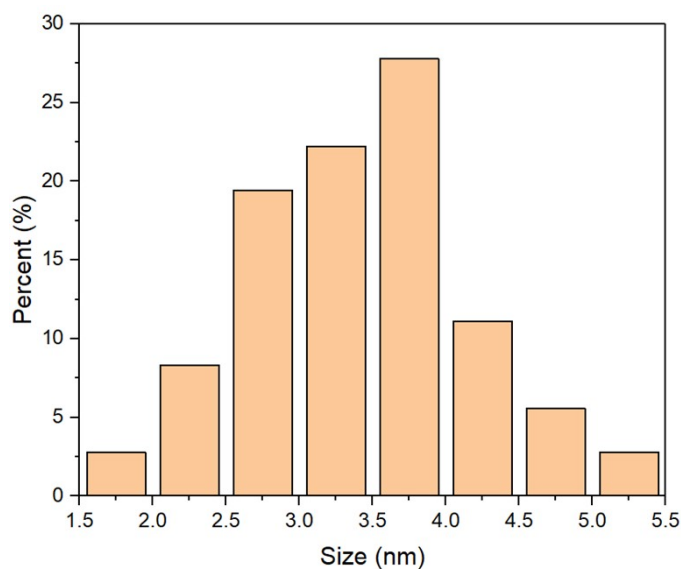

Figure S1 The size distribution of silicon nanodots

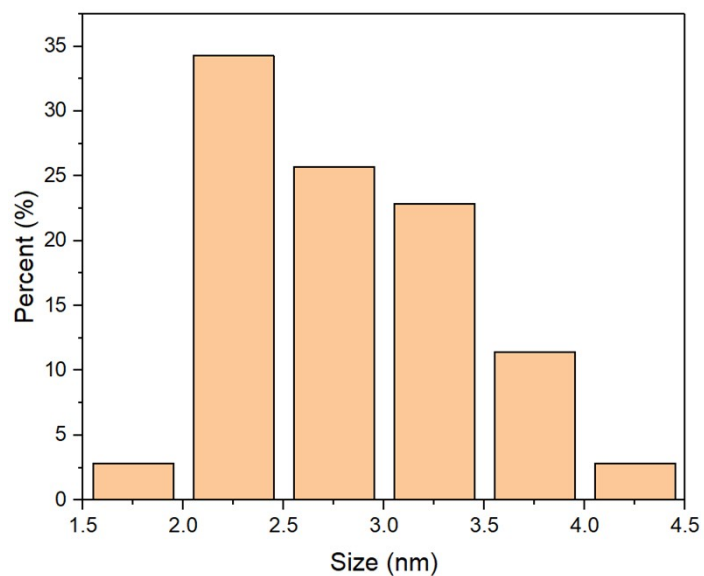

Figure S2 The size distribution of green-emitting carbon nanodots

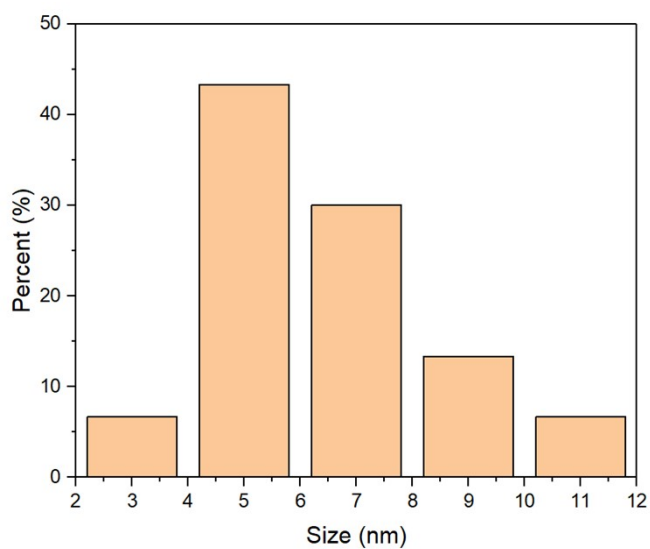

Figure S3 The size distribution of red-emitting carbon nanodots

Table S1. The PLQY of QDs and POSS-QDs.

|      | SiQDs      | G-CQDs      | R-CQDs      |
|------|------------|-------------|-------------|
| PLQY | 28.6%      | 37.5%       | 34.7%       |
|      | POSS-SiQDs | POSS-G-CQDs | POSS-R-CQDs |
| PLQY | 35.2%      | 42.9%       | 40.1%       |

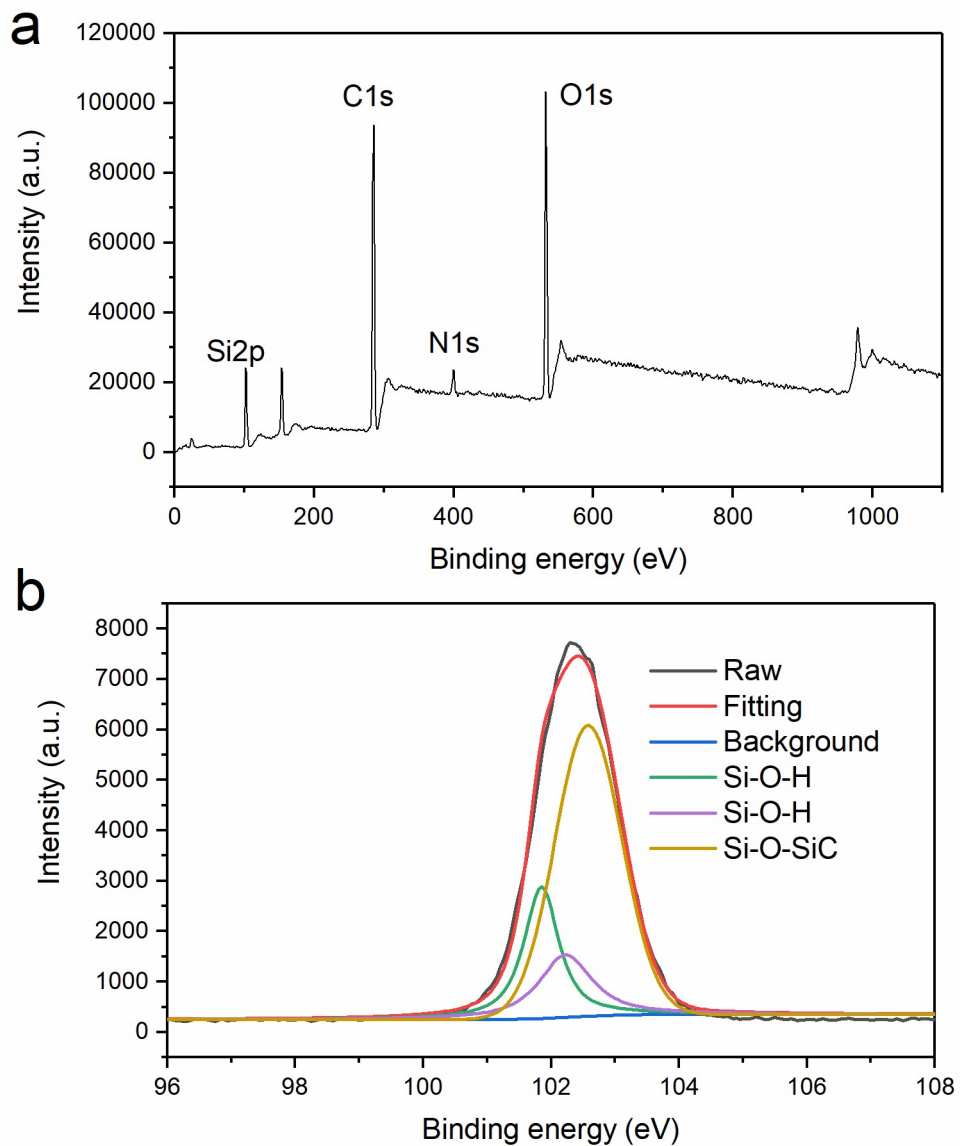

Figure S4 Survey XPS spectrum of POSS-Si NDs and the high resolution XPS peaks of Si 2p

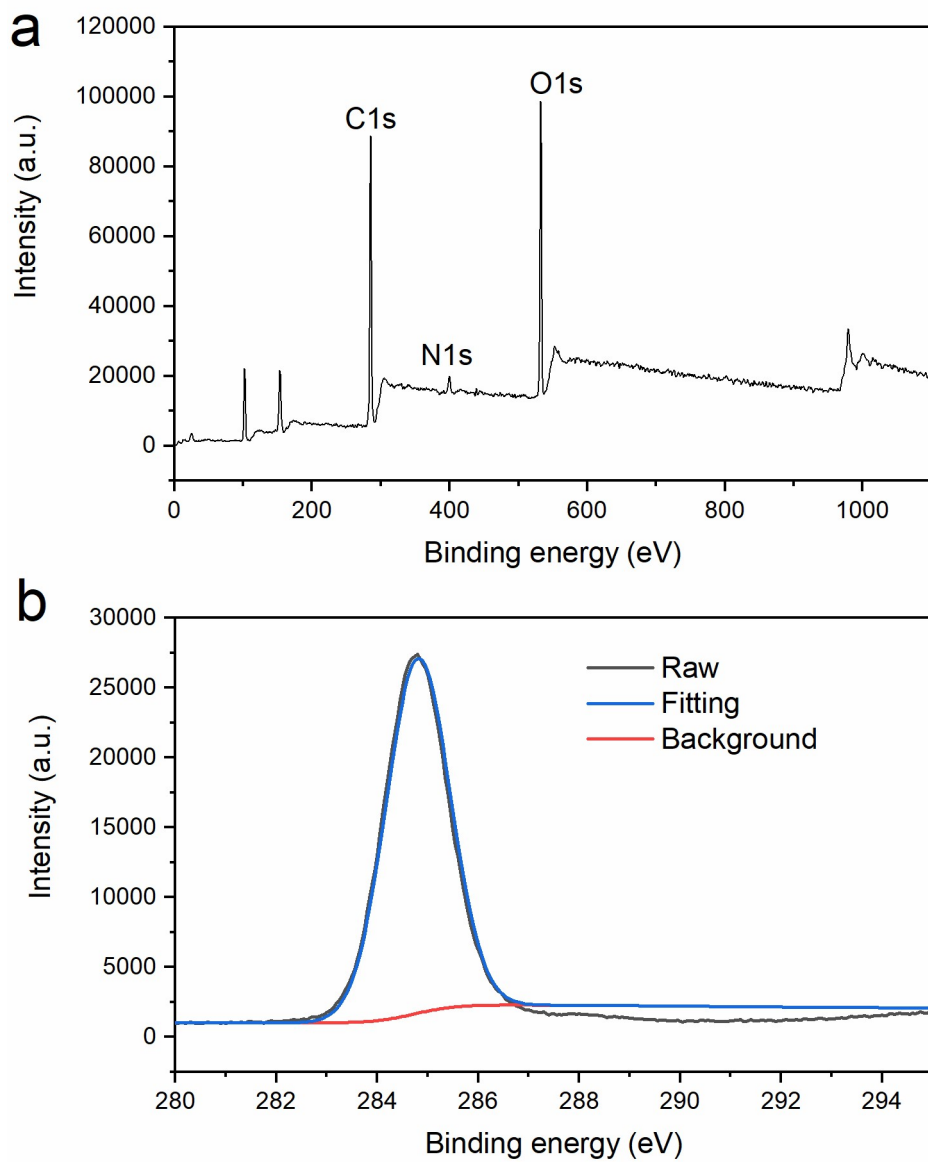

Figure S5 Survey XPS spectrum of POSS-G-CQDs and the high resolution XPS peaks of C 1s.

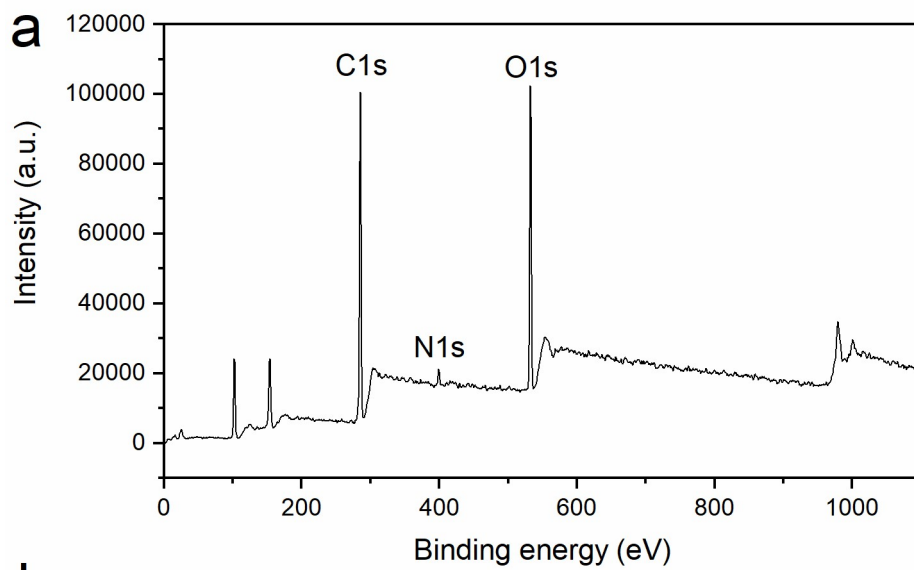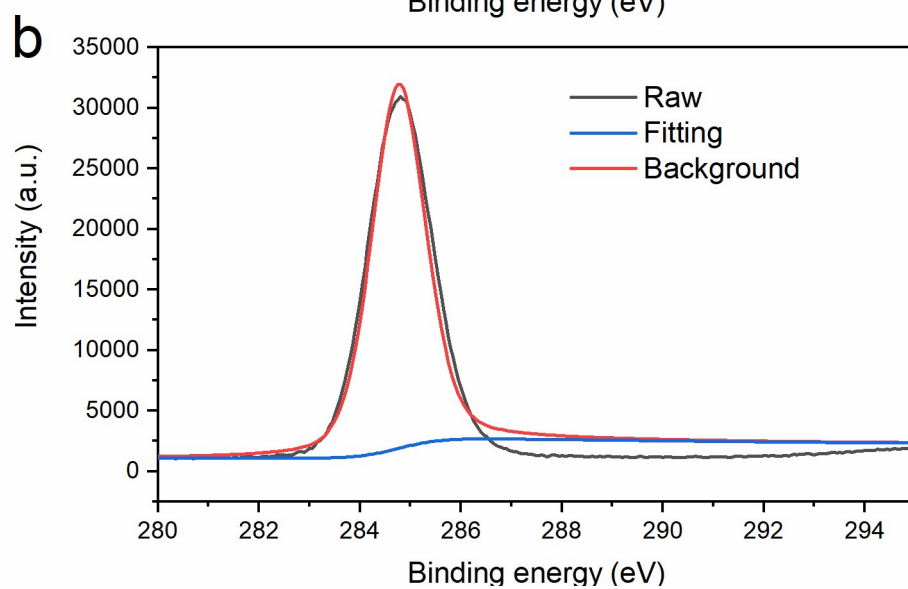

Figure S6 Survey XPS spectrum of POSS-R-CQDs and the high resolution XPS peaks of C 1s.
